# Supplementary material for: A turn on fluorescent sensor based on lanthanide coordination polymer nanoparticles for the detection of mercury(ii) in biological fluids
Source: Royal Society of Chemistry journal article supplement (doi:10.1039/c5ra26849d), 2016-01-01
Supplement: c5ra26849d1.pdf [file c5ra26849d1.pdf]

## Supporting Information

### **A turn on fluorescent sensor based on lanthanide coordination polymer nanoparticles for the detection of mercury (II) in biological fluids**

Qian Li,<sup>a</sup> Chengjuan Wang,<sup>b</sup> Hongliang Tan,<sup>a,\*</sup> Gongge Tang,<sup>a</sup> Jie Gao,<sup>a</sup> Chia-Hung Chen,<sup>c,\*</sup>

<sup>a</sup> Key Laboratory of Functional Small Organic Molecule (MOE), Jiangxi Provincial Key Laboratory of Chemical Biology, College of Chemistry and Chemical Engineering, Jiangxi Normal University, Nanchang, 330022, P R China.

<sup>b</sup> Institute of Geological Survey of Jiangxi Province, Nanchang, 330030, P R China.

<sup>c</sup> Department of Biomedical Engineering, National University of Singapore, Block E4, #04-08, 4 Engineering Drive 3, Singapore 117583

\*Corresponding author: E-mail: [hltan@jxnu.edu.cn](mailto:hltan@jxnu.edu.cn) (H. Tan); [biecch@nus.edu.sg](mailto:biecch@nus.edu.sg) (C.-H. Chen)

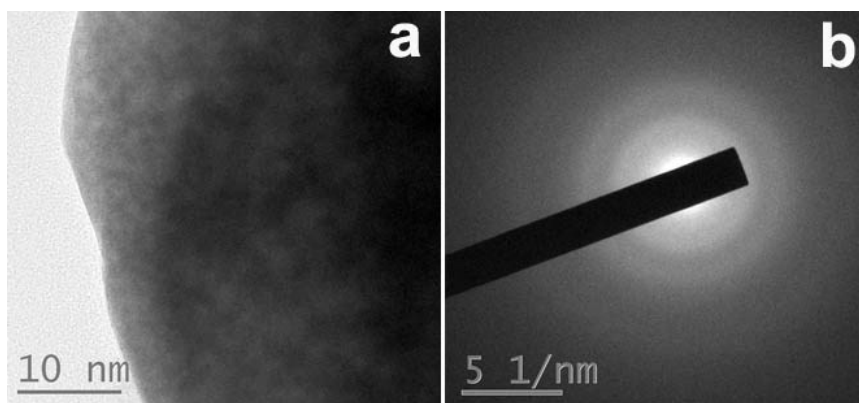

Figure S1. HR TEM image (a) and selected area electron diffraction (SAED) image of Eu/IPA CPNPs.

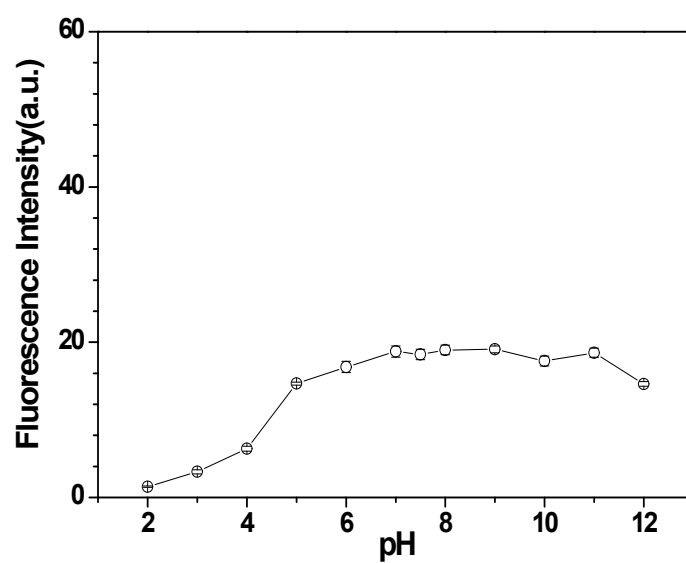

Figure S2. Changes of the fluorescence of 26.5  $\mu\text{g/mL}$  of Eu/IPA CPNPs in the presence of 320  $\mu\text{M}$  of Im in the reaction media with different pH values.

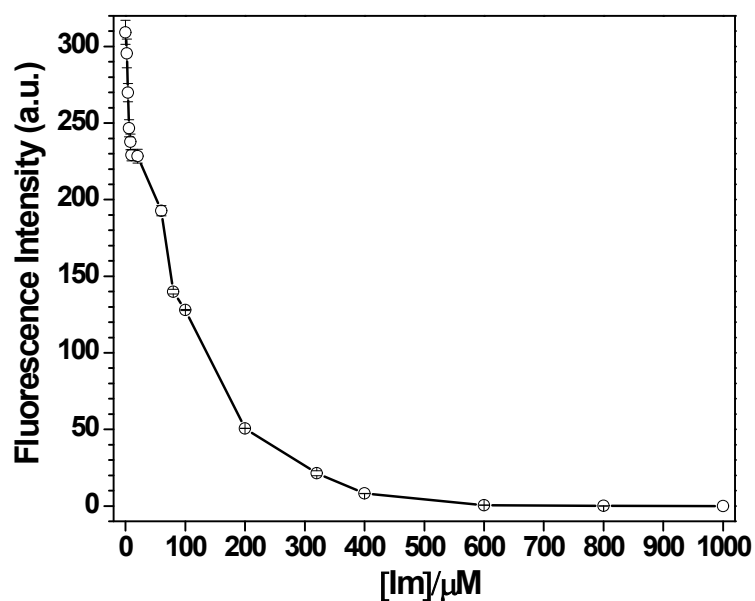

Figure S3. Fluorescence changes of Eu/IPA CPNPs in the presence of Im with different concentrations. The reactions were performed in Tris-HCl buffer (25 mM, pH 7.0) with 26.5  $\mu\text{g/mL}$  Eu/IPA CPNPs and Im with final concentration from 0 to 1000  $\mu\text{M}$  at room temperature, the total volume is 100  $\mu\text{L}$ .

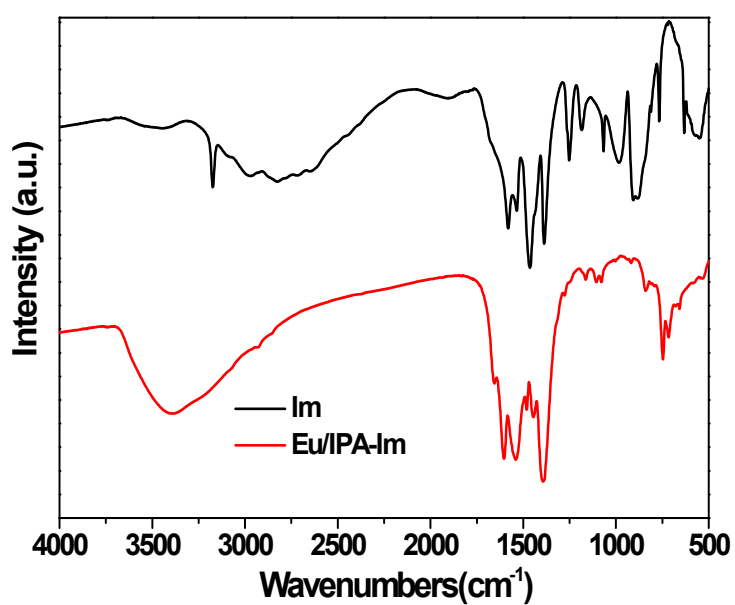

Figure S4. FTIR spectra of pure Im and Eu/IPA-Im complex.

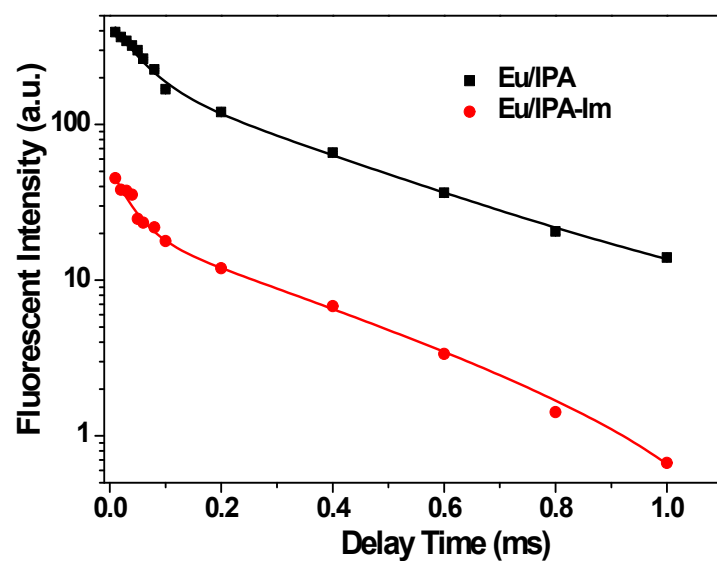

Figure S5. Emission lifetime of Eu/IPA CPNPs and Eu/IPA-Im complex in the absence and presence of  $1.5 \mu\text{M Hg}^{2+}$ .

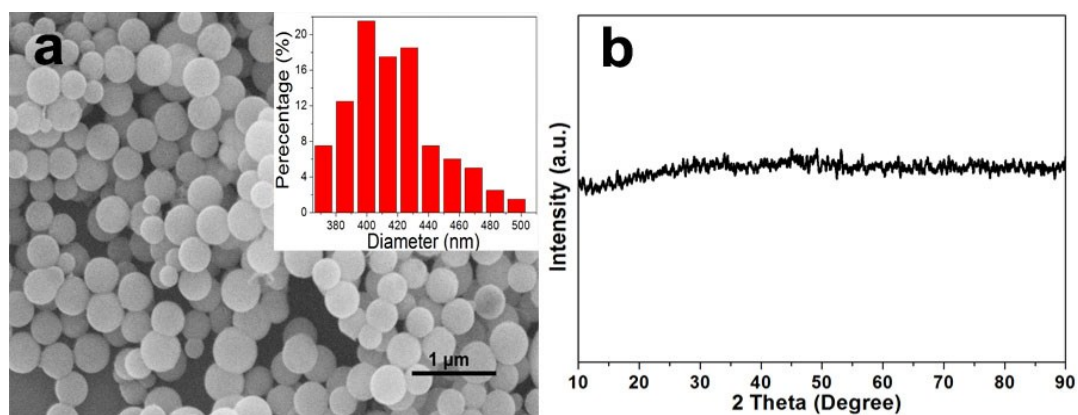

Figure S6. SEM (a) and XRD (b) of Eu/IPA CPNPs in the presence of Im. Inset is the size distribution of Eu/IPA-Im complex that were estimated from the particle diameter on the SEM images.

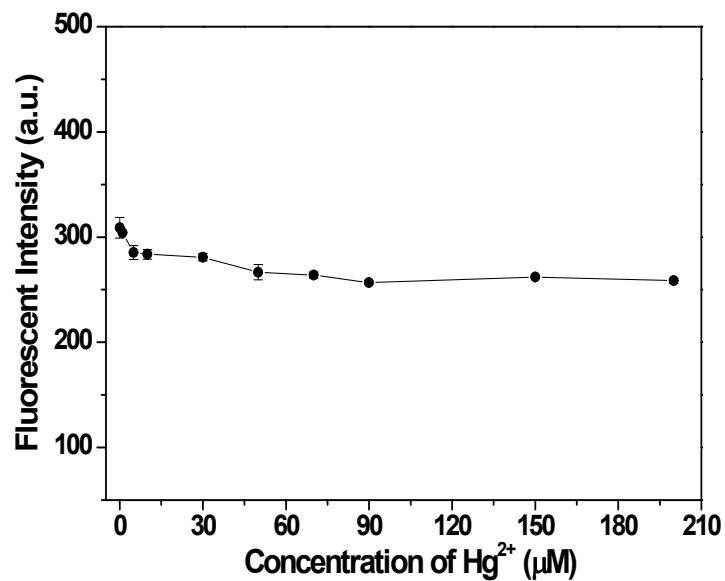

Figure S7. Effects of  $\text{Hg}^{2+}$  with different concentrations on the fluorescence of Eu/IPA CPNPs.

The reactions were performed in Tris-HCl buffer (25 mM, pH 7.0) with 26.5  $\mu\text{g/mL}$  Eu/IPA CPNPs and  $\text{Hg}^{2+}$  with final concentration from 0 to 200  $\mu\text{M}$  at room temperature, the total volume is 100  $\mu\text{L}$ .

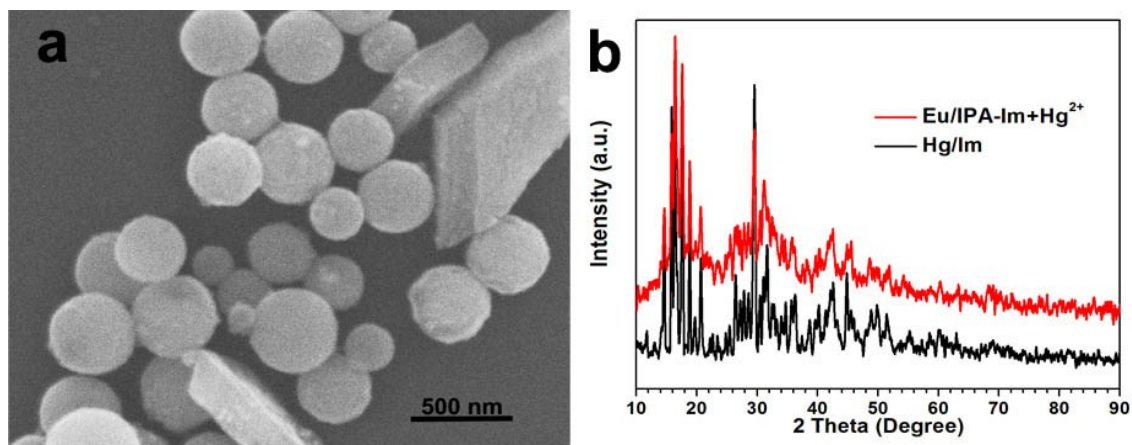

Figure S8. SEM image of Eu/IPA-Im complex in the presence of 100  $\mu\text{M}$   $\text{Hg}^{2+}$  (a) and XRD pattern of Eu/IPA-Im complex in the presence of 100  $\mu\text{M}$   $\text{Hg}^{2+}$  and pure Im/Hg complex (b).

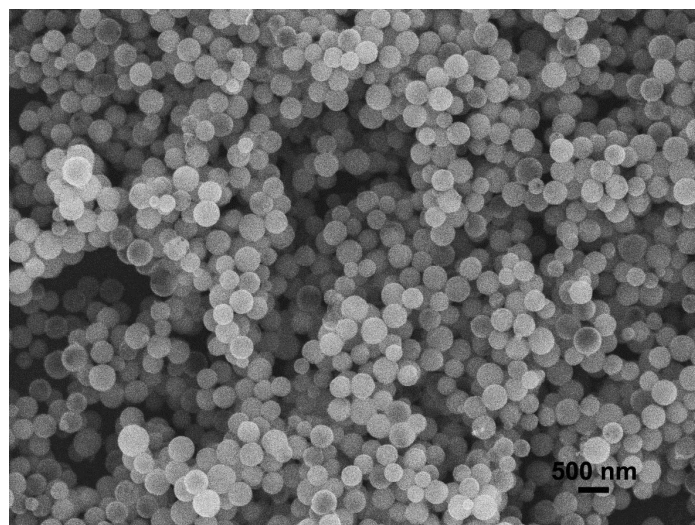

Figure S9. SEM image of CPNPs in the presence of  $\text{Hg}^{2+}$  (100  $\mu\text{M}$ ).

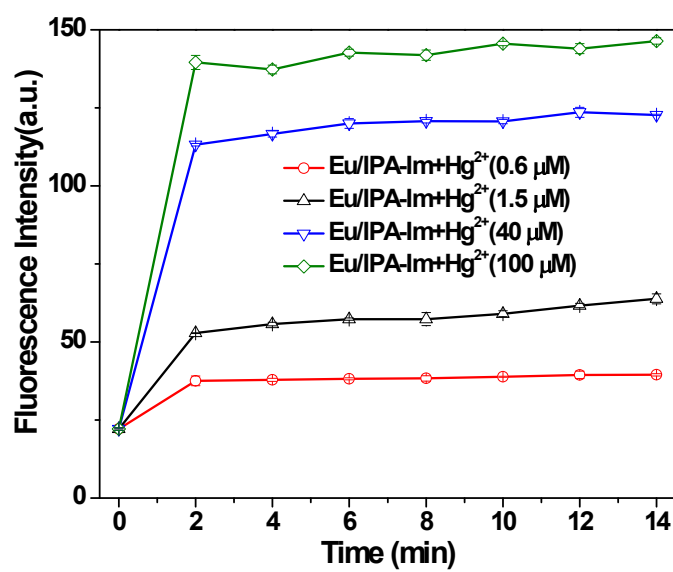

Figure S10. Time-dependent fluorescence changes of Eu/IPA-Im complex in the presence of  $\text{Hg}^{2+}$  with different concentrations (0.6, 1.5, 40, 100  $\mu\text{M}$ ).

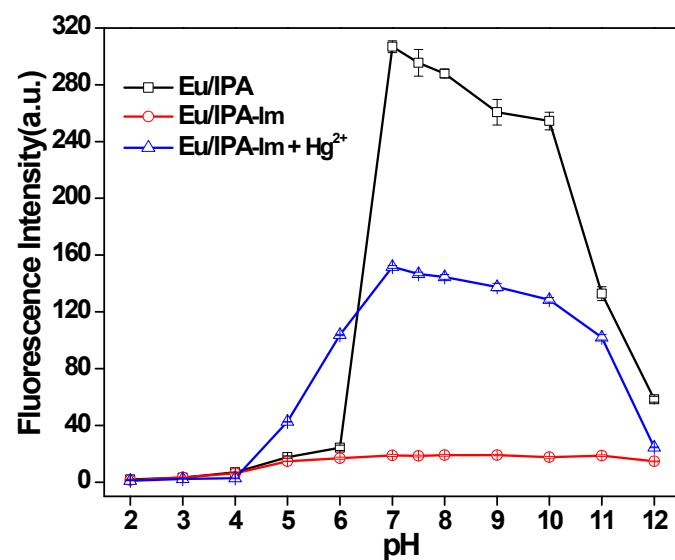

Figure S11. Effects of pH on the fluorescence of Eu/IPA CPNPs, Eu/IPA-Im complex in the absence and presence of 100  $\mu\text{M}$  Hg<sup>2+</sup>.

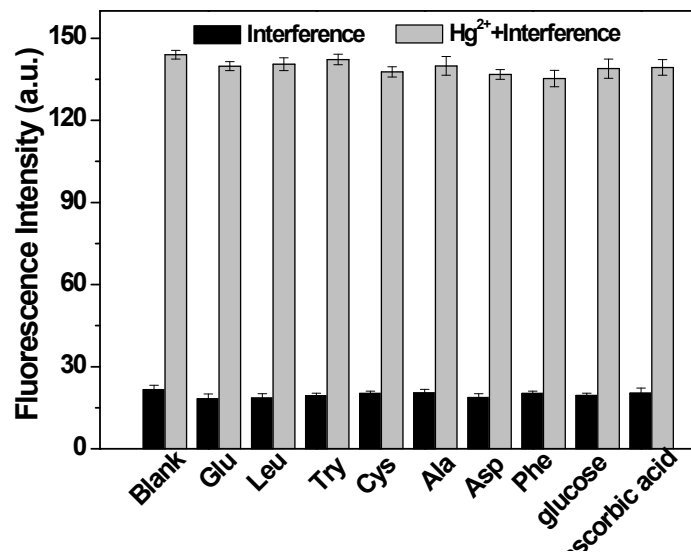

Figure S12. Effects of the interfering substances (each 100  $\mu\text{M}$ ) coexisted in urine on the fluorescence of Eu/IPA-Im complex.

Table S1. Determination of Hg<sup>2+</sup> in urine samples

| <b>Samples</b> | <b>Founded<br/>(nM)</b> | <b>Added<br/>(nM)</b> | <b>Detected<br/>(nM)</b> | <b>RSD (% , n=3)</b> | <b>Recovery(%)</b> |
|----------------|-------------------------|-----------------------|--------------------------|----------------------|--------------------|
| <b>Urine-1</b> | 0                       | 10                    | 10.85 ± 0.71             | 3.16                 | 108.5              |
| <b>Urine-2</b> | 0                       | 200                   | 196.05 ± 0.94            | 3.37                 | 98.03              |
| <b>Urine-3</b> | 0                       | 800                   | 789.01 ± 1.33            | 3.81                 | 98.63              |
